# Supplementary material
Source: PubMed Central journal article supplement (PMC4550548)
Supplement: NIHMS700399-supplement-Online_supplemental_tables_and_figures.pdf [file NIHMS700399-supplement-Online_supplemental_tables_and_figures.pdf]

**ONLINE SUPPLEMENT**

**The role of acute lesion topography in initial ischemic stroke severity and long-term functional outcomes**

**Table I:** Distribution of the cluster in the left hemisphere as a percentage of the region of interest (ROI) in regions that have a maximum power of at least 50% in either left or right hemisphere at alpha=0.001 across 490 subjects. \*Volume = acute DWI lesion volume

|                                       | Maximum Power % | NIH | NIH age+sex | NIH age+sex +volume* | mRS | mRS age+sex | mRS age+sex +volume* |
|---------------------------------------|-----------------|-----|-------------|----------------------|-----|-------------|----------------------|
| Amygdala                              | 71              | 30  | 30          | 10                   | 28  | 28          | 1                    |
| Angular Gyrus                         | 74              | 34  | 33          | 0                    | 7   | 2           | 0                    |
| Anterior Corona Radiata               | 86              | 47  | 47          | 3                    | 45  | 37          | 0                    |
| Anterior Limb of the Internal Capsule | 82              | 84  | 84          | 46                   | 81  | 82          | 4                    |
| Body of the corpus callosum           | 39              | 2   | 2           | 0                    | 2   | 2           | 0                    |
| Caudate                               | 74              | 34  | 35          | 10                   | 20  | 30          | 0                    |
| Central Opercular Cortex              | 80              | 91  | 91          | 10                   | 80  | 82          | 1                    |
| Cerebral Peduncle                     | 51              | 0   | 0           | 0                    | 0   | 0           | 0                    |
| External Capsule                      | 95              | 98  | 98          | 70                   | 98  | 96          | 8                    |
| Fornix                                | 71              | 31  | 32          | 3                    | 15  | 21          | 0                    |
| Frontal Operculum Cortex              | 74              | 90  | 90          | 15                   | 67  | 53          | 0                    |
| Frontal Orbital Cortex                | 55              | 30  | 30          | 1                    | 27  | 17          | 0                    |
| Frontal Pole                          | 39              | 4   | 4           | 0                    | 2   | 0           | 0                    |
| Genu of the corpus callosum           | 35              | 0   | 0           | 0                    | 0   | 0           | 0                    |
| Heschl's                              | 62              | 78  | 77          | 0                    | 20  | 27          | 0                    |

|                                              | Maximum Power % | NIH | NIH age+sex | NIH age+sex +volume* | mRS | mRS age+sex | mRS age+sex +volume* |
|----------------------------------------------|-----------------|-----|-------------|----------------------|-----|-------------|----------------------|
| Gyrus                                        |                 |     |             |                      |     |             |                      |
| Inferior Frontal Gyrus pars opercularis      | 68              | 80  | 80          | 8                    | 47  | 25          | 0                    |
| Inferior Frontal Gyrus pars triangularis     | 51              | 70  | 70          | 0                    | 39  | 6           | 0                    |
| Insula                                       | 91              | 76  | 76          | 23                   | 65  | 67          | 0                    |
| Lateral Occipital Cortex Inferior Division   | 55              | 6   | 5           | 0                    | 1   | 1           | 0                    |
| Lateral Occipital Cortex Superior Division   | 65              | 11  | 10          | 0                    | 3   | 2           | 0                    |
| Middle Frontal Gyrus                         | 58              | 41  | 41          | 0                    | 26  | 9           | 0                    |
| Middle Temporal Gyrus Anterior Division      | 31              | 4   | 4           | 0                    | 0   | 0           | 0                    |
| Middle Temporal Gyrus Posterior Division     | 47              | 11  | 6           | 0                    | 0   | 0           | 0                    |
| Middle Temporal Gyrus Temporo-occipital part | 68              | 41  | 40          | 0                    | 8   | 9           | 0                    |
| Pallidum                                     | 87              | 71  | 71          | 29                   | 64  | 68          | 0                    |

|                                              | Maximum Power % | NIH | NIH age+sex | NIH age+sex +volume* | mRS | mRS age+sex | mRS age+sex +volume* |
|----------------------------------------------|-----------------|-----|-------------|----------------------|-----|-------------|----------------------|
| Parietal Operculum Cortex                    | 80              | 98  | 98          | 0                    | 58  | 53          | 0                    |
| Planum Polare                                | 55              | 18  | 17          | 0                    | 10  | 10          | 0                    |
| Planum Temporale                             | 74              | 48  | 51          | 0                    | 2   | 2           | 0                    |
| Postcentral Gyrus                            | 74              | 33  | 33          | 2                    | 32  | 32          | 1                    |
| Posterior corona radiata                     | 86              | 58  | 57          | 2                    | 51  | 47          | 8                    |
| Posterior Limb of the Internal Capsule       | 95              | 74  | 74          | 37                   | 66  | 64          | 8                    |
| Posterior thalamic radiation                 | 71              | 22  | 21          | 0                    | 9   | 6           | 0                    |
| Precentral Gyrus                             | 76              | 29  | 29          | 5                    | 19  | 14          | 0                    |
| Putamen                                      | 93              | 91  | 91          | 52                   | 86  | 88          | 3                    |
| Retrolenticular part of the internal capsule | 92              | 83  | 84          | 4                    | 50  | 52          | 0                    |
| Sagittal stratum                             | 80              | 16  | 14          | 0                    | 13  | 12          | 0                    |
| Superior corona radiata                      | 93              | 85  | 85          | 37                   | 85  | 83          | 9                    |
| Superior fronto-occipital fasciculus         | 78              | 100 | 100         | 73                   | 100 | 100         | 15                   |
| Superior longitudinal fasciculus             | 88              | 92  | 91          | 6                    | 80  | 78          | 12                   |
| Superior                                     | 55              | 25  | 24          | 0                    | 16  | 12          | 0                    |

|                                            | Maximum Power % | NIH | NIH age+sex | NIH age+sex +volume* | mRS | mRS age+sex | mRS age+sex +volume* |
|--------------------------------------------|-----------------|-----|-------------|----------------------|-----|-------------|----------------------|
| Parietal lobule                            |                 |     |             |                      |     |             |                      |
| Superior Temporal Gyrus Anterior Division  | 31              | 19  | 19          | 0                    | 0   | 0           | 0                    |
| Superior Temporal Gyrus Posterior Division | 71              | 18  | 15          | 0                    | 0   | 0           | 0                    |
| Supramarginal Gyrus Anterior Division      | 82              | 73  | 73          | 0                    | 64  | 60          | 0                    |
| Supramarginal Gyrus Posterior Division     | 80              | 53  | 52          | 0                    | 30  | 20          | 0                    |
| Temporal Pole                              | 31              | 0   | 0           | 0                    | 0   | 0           | 0                    |
| Thalamus                                   | 62              | 1   | 1           | 0                    | 1   | 1           | 0                    |
| Uncinate fasciculus                        | 82              | 87  | 87          | 18                   | 86  | 87          | 7                    |
| Unclassified cerebral cortex               | 80              | 11  | 10          | 1                    | 6   | 5           | 0                    |
| Unclassified white matter                  | 93              | 35  | 34          | 2                    | 28  | 23          | 1                    |

**Table II:** Distribution of the cluster in the right hemisphere as a percentage of the region of interest (ROI) in regions that have a maximum power of at least 50% in either left or right hemisphere at  $\alpha=0.001$  across 490 subjects.

|                                            | Maximum Power % | NIH | NIH age+sex | mRS | mRS age+sex |
|--------------------------------------------|-----------------|-----|-------------|-----|-------------|
| Amygdala                                   | 92              | 20  | 20          | 1   | 6           |
| Angular Gyrus                              | 76              | 21  | 29          | 6   | 16          |
| Anterior Corona Radiata                    | 97              | 72  | 72          | 37  | 50          |
| Anterior Limb of the Internal Capsule      | 97              | 83  | 84          | 9   | 28          |
| Body of the corpus callosum                | 68              | 11  | 11          | 7   | 8           |
| Caudate                                    | 90              | 56  | 60          | 3   | 15          |
| Central Opercular Cortex                   | 95              | 99  | 100         | 14  | 52          |
| Cerebral Peduncle                          | 15              | 0   | 0           | 0   | 0           |
| External Capsule                           | 100             | 99  | 100         | 15  | 51          |
| Fornix                                     | 80              | 18  | 20          | 0   | 0           |
| Frontal Operculum Cortex                   | 88              | 96  | 98          | 7   | 18          |
| Frontal Orbital Cortex                     | 71              | 45  | 45          | 17  | 21          |
| Frontal Pole                               | 62              | 8   | 8           | 2   | 3           |
| Genu of the corpus callosum                | 65              | 7   | 7           | 6   | 6           |
| Heschl's Gyrus                             | 78              | 92  | 96          | 8   | 39          |
| Inferior Frontal Gyrus pars opercularis    | 86              | 89  | 90          | 33  | 42          |
| Inferior Frontal Gyrus pars triangularis   | 71              | 79  | 79          | 34  | 48          |
| Insula                                     | 98              | 89  | 93          | 7   | 32          |
| Lateral Occipital Cortex Inferior Division | 68              | 0   | 0           | 0   | 0           |
| Lateral Occipital Cortex Superior Division | 68              | 0   | 0           | 0   | 0           |
| Middle Frontal Gyrus                       | 68              | 44  | 45          | 26  | 31          |
| Middle Temporal Gyrus Anterior Division    | 65              | 51  | 51          | 0   | 0           |

|                                              | Maximum Power % | NIH | NIH age+sex | mRS | mRS age+sex |
|----------------------------------------------|-----------------|-----|-------------|-----|-------------|
| Middle Temporal Gyrus Posterior Division     | 68              | 57  | 62          | 0   | 0           |
| Middle Temporal Gyrus Temporo-occipital part | 76              | 8   | 10          | 0   | 0           |
| Pallidum                                     | 96              | 55  | 59          | 0   | 17          |
| Parietal Operculum Cortex                    | 87              | 82  | 88          | 13  | 51          |
| Planum Polare                                | 80              | 85  | 95          | 0   | 15          |
| Planum Temporale                             | 78              | 81  | 86          | 18  | 45          |
| Postcentral Gyrus                            | 84              | 23  | 26          | 4   | 8           |
| Posterior corona radiata                     | 90              | 13  | 13          | 12  | 13          |
| Posterior Limb of the Internal Capsule       | 100             | 50  | 54          | 8   | 20          |
| Posterior thalamic radiation                 | 74              | 0   | 2           | 0   | 0           |
| Precentral Gyrus                             | 84              | 38  | 38          | 14  | 14          |
| Putamen                                      | 100             | 94  | 94          | 7   | 46          |
| Retrolicular part of the internal capsule    | 98              | 43  | 49          | 6   | 18          |
| Sagittal stratum                             | 78              | 19  | 25          | 0   | 0           |
| Superior corona radiata                      | 99              | 85  | 84          | 51  | 68          |
| Superior fronto-occipital fasciculus         | 96              | 100 | 100         | 5   | 37          |
| Superior longitudinal fasciculus             | 98              | 59  | 59          | 32  | 40          |
| Superior Parietal lobule                     | 43              | 0   | 0           | 0   | 0           |
| Superior Temporal Gyrus Anterior Division    | 71              | 87  | 89          | 0   | 7           |
| Superior Temporal Gyrus Posterior Division   | 76              | 60  | 67          | 1   | 3           |
| Supramarginal Gyrus Anterior Division        | 82              | 28  | 36          | 2   | 15          |
| Supramarginal Gyrus Posterior Division       | 82              | 33  | 39          | 6   | 24          |

|                              | Maximum Power % | NIH | NIH age+sex | mRS | mRS age+sex |
|------------------------------|-----------------|-----|-------------|-----|-------------|
| Temporal Pole                | 68              | 20  | 21          | 0   | 2           |
| Thalamus                     | 58              | 0   | 0           | 0   | 0           |
| Uncinate fasciculus          | 95              | 100 | 100         | 18  | 52          |
| Unclassified cerebral cortex | 95              | 15  | 17          | 2   | 4           |
| Unclassified white matter    | 100             | 32  | 33          | 9   | 14          |



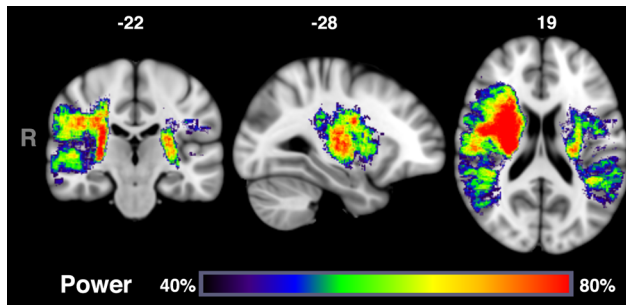

**Figure I:** Power maps for  $\alpha=0.001$  for 40 to 80% power in the subset of patients who were alive at 3 to 6 months (N=439).

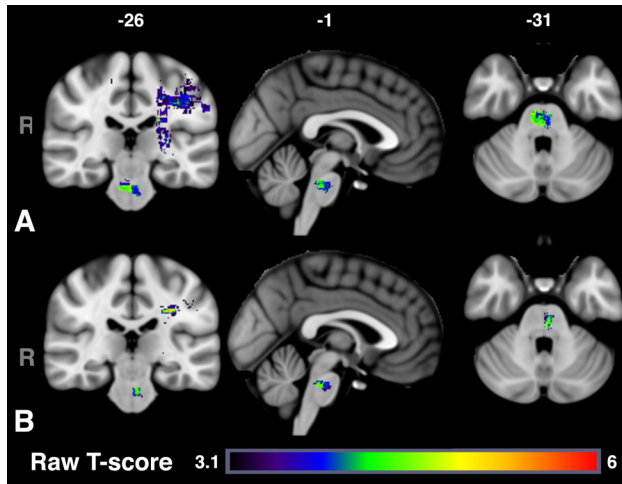

**Figure II.** Uncorrected T-maps with voxel-wise threshold of  $P < 0.001$  using sex, age and lesion volume as covariates for (A) admission NIHSS scores and (B) follow-up mRS scores show a region in the brain-stem to also be associated more with more severe stroke symptoms at presentation and greater long-term disability. After correction for multiple comparisons, this cluster did not meet statistical significance ( $P > 0.05$ ).
